# Supplementary material
Source: publisher site journal article supplement (https://www.spandidos-publications.com/6731/downloadSupplementary)
Supplement: Supplementary file 1 [file downloadSupplementary]

## Sheet: Table SI
Table SI. Microsatellite instability and clinicopathological features in 68 follow-up cases of colorectal cancer.
ID no.	Status	Time, months	Microsatellite status	Sex	Age, years	TNM stage	Site
1117035	Survival	56	MSI-H	Male	≤60	I-II	Left colon
1179630	Survival	45	MSI-H	Female	≤60	I-II	Right colon
1198109	Survival	40	MSI-H	Female	>60	I-II	Right colon
1242471	Survival	33	MSI-H	Female	≤60	III-IV	Right colon
1243913	Survival	33	MSI-H	Male	≤60	III-IV	Left colon
1248827	Survival	32	MSI-H	Male	≤60	I-II	Right colon
1254606	Survival	31	MSI-H	Male	>60	I-II	Right colon
1260439	Survival	30	MSI-H	Female	>60	III-IV	Right colon
1260542	Survival	30	MSI-H	Male	≤60	III-IV	Left colon
1284670	Survival	27	MSI-H	Female	≤60	I-II	Left colon
1164629	Survival	47	MSI-H	Male	≤60	I-II	Left colon
214145	Survival	79	MSI-H	Male	≤60	III-IV	Right colon
1300253	Survival	25	MSI-H	Male	≤60	I-II	Left colon
1280359	Survival	27	MSI-H	Female	≤60	I-II	Left colon
1270546	Survival	28	MSI-H	Male	≤60	I-II	Left colon
1300259	Survival	25	MSI-H	Male	≤60	I-II	Left colon
1303811	Survival	24	MSI-H	Male	≤60	I-II	Rectum
1297158	Survival	25	MSI-H	Female	≤60	I-II	Right colon
1304361	Survival	24	MSI-H	Male	>60	I-II	Right colon
1269723	Survival	28	MSI-H	Male	≤60	III-IV	Right colon
1309522	Survival	23	MSI-H	Female	≤60	I-II	Left colon
1283214	Survival	27	MSI-H	Female	>60	I-II	Rectum
1271985	Survival	28	MSI-H	Male	>60	I-II	Right colon
1228276	Survival	35	MSS	Female	≤60	III-IV	Rectum
1234193	Survival	34	MSS	Male	≤60	III-IV	Left colon
1234294	Survival	33	MSS	Female	≤60	III-IV	Right colon
1300416	Survival	33	MSS	Female	≤60	III-IV	Left colon
1247233	Survival	33	MSS	Male	≤60	III-IV	Right colon
1252406	Survival	32	MSS	Male	≤60	III-IV	Left colon
1257807	Survival	31	MSS	Male	≤60	I-II	Rectum
1276003	Survival	28	MSS	Female	≤60	I-II	Rectum
1329031	Survival	20	MSS	Male	>60	I-II	Left colon
1300663	Survival	25	MSS	Male	>60	I-II	Rectum
1302630	Survival	25	MSS	Male	≤60	I-II	Left colon
1302943	Survival	24	MSS	Male	≤60	I-II	Rectum
1303159	Survival	24	MSS	Male	≤60	I-II	Left colon
1291543	Survival	34	MSS	Female	>60	III-IV	Rectum
1280620	Survival	27	MSS	Male	≤60	III-IV	Rectum
1280935	Survival	27	MSS	Male	≤60	I-II	Left colon
1281020	Survival	27	MSS	Female	≤60	I-II	Right colon
1278076	Survival	28	MSS	Male	>60	I-II	Left colon
1273312	Survival	28	MSS	Male	≤60	I-II	Right colon
1273688	Survival	28	MSS	Male	≤60	III-IV	Rectum
1276401	Survival	28	MSS	Male	≤60	III-IV	Rectum
1276420	Survival	28	MSS	Male	≤60	III-IV	Left colon
1276428	Survival	28	MSS	Female	>60	III-IV	Rectum
1277092	Survival	28	MSS	Female	>60	III-IV	Rectum
1277093	Survival	28	MSS	Female	≤60	III-IV	Left colon
1271911	Survival	29	MSS	Female	>60	III-IV	Left colon
1271961	Survival	29	MSS	Male	≤60	III-IV	Rectum
1279547	Survival	28	MSS	Female	>60	III-IV	Rectum
1279648	Survival	28	MSS	Male	>60	I-II	Left colon
1171000	Survival	46	MSS	Male	>60	III-IV	Rectum
1237022	Death	18	MSI-H	Female	≤60	I-II	Right colon
1258222	Death	6	MSI-H	Male	≤60	I-II	Right colon
1184338	Death	8	MSS	Male	≤60	III-IV	Rectum
1218018	Death	18	MSS	Male	≤60	III-IV	Rectum
1221446	Death	15	MSS	Male	>60	III-IV	Right colon
1225143	Death	2	MSS	Male	≤60	III-IV	Left colon
1237059	Death	29	MSS	Male	>60	III-IV	Left colon
1237133	Death	24	MSS	Male	>60	III-IV	Rectum
1242966	Death	12	MSS	Male	>60	III-IV	Rectum
1245172	Death	24	MSS	Male	≤60	III-IV	Rectum
1255334	Death	28	MSS	Male	≤60	III-IV	Rectum
1256598	Death	19	MSS	Male	≤60	III-IV	Left colon
1256797	Death	3	MSS	Male	>60	III-IV	Left colon
1303123	Death	2	MSS	Female	≤60	III-IV	Right colon
1176024	Death	45	MSS	Male	≤60	III-IV	Right colon
MSI-H, high-frequency microsatellite instability; MSS, microsatellite stability; TNM, Tumor-Node-Metastasis.
